# Supplementary material for: Selective metal recovery by mucin: turning gold from wastewater into a peroxymonosulfate-activated catalyst
Source: Royal Society of Chemistry journal article supplement (doi:10.1039/d3en00699a), 2024-01-01
Supplement: d3en00699a1.pdf [file d3en00699a1.pdf]

## *Supporting Information*

# **Selective Metal Recovery by Mucin: Turning Gold from Wastewater into a Peroxymonosulfate-activated Catalyst**

Shira Gavriely<sup>1,2</sup>, Shachar Richter<sup>1,2</sup>, Ines Zucker<sup>3,4</sup>

<sup>1</sup> Department of Materials Science and Engineering, Faculty of Engineering, Tel Aviv University, Tel Aviv 69978, Israel

<sup>2</sup> University Center for Nano Science and Nanotechnology

<sup>3</sup> School of Mechanical Engineering, Faculty of Engineering, Tel Aviv University, Tel Aviv 69978, Israel

<sup>4</sup> The Porter School of Environmental and Earth Sciences, Tel Aviv University, 69978, Israel

\* Corresponding author; Address: Tel Aviv University, Tel Aviv 69978, Israel; Tel: (+972) 73-3804581; email: [ineszucker@tauex.tau.ac.il](mailto:ineszucker@tauex.tau.ac.il)

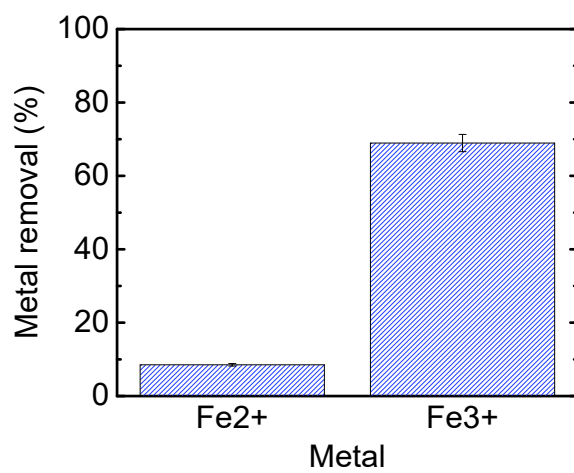

**Figure S1.** Fe<sup>3+</sup> vs. Fe<sup>2+</sup> removal by 0.1 g L<sup>-1</sup> mucin in a 0.05 mM solution for each ion.

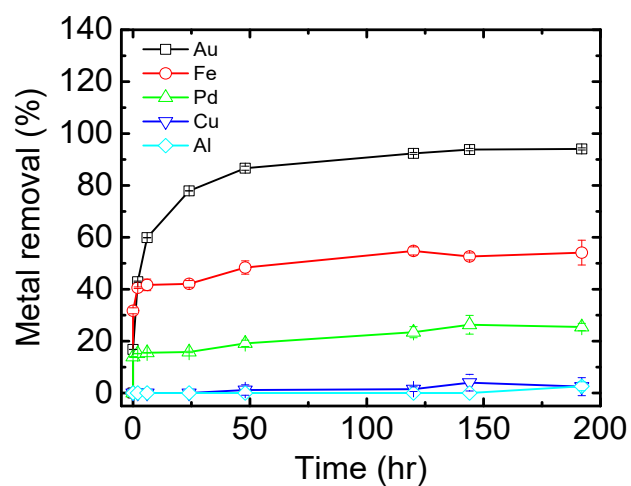

**Figure S2.** Kinetics of metal removal in the mixed-metal solution during 200 hr.

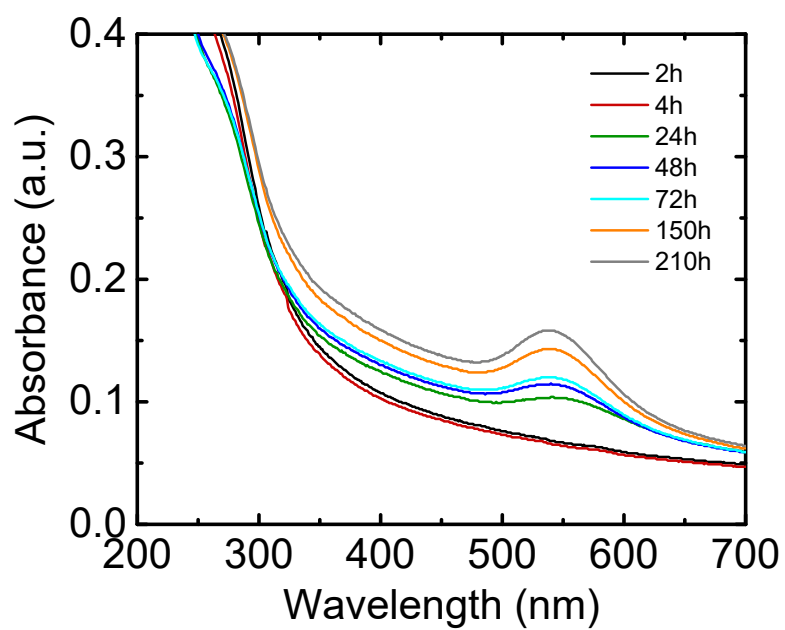

**Figure S3.** UV-VIS spectra of Au nanoparticles formation with mucin over several time points.

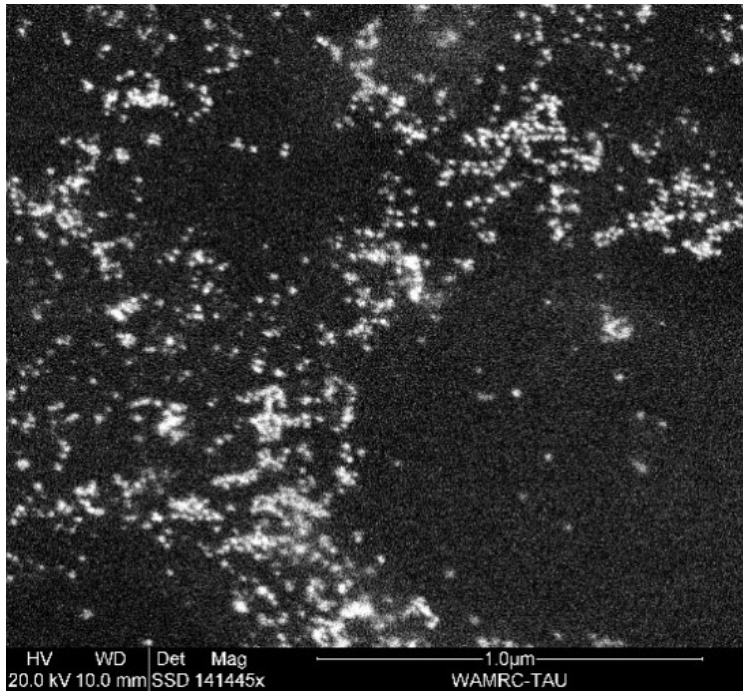

**Figure S4.** Scanning electron microscopy image in back-scattered mode of Au nanoparticles formed in the isolated Au metal solution.

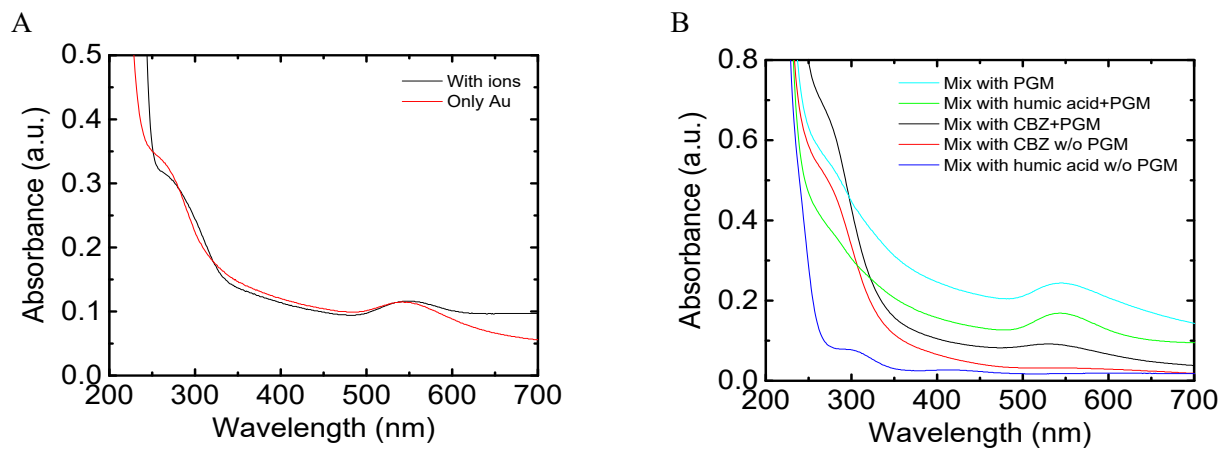

**Figure S5.** Au nanoparticles formation with the presence of (A) small cations ( $\text{Na}^+$ ,  $\text{Ca}^{2+}$ ,  $\text{K}^+$ ) and mucin. (B) Organic substances (CBZ and humic acid) with and without mucin.

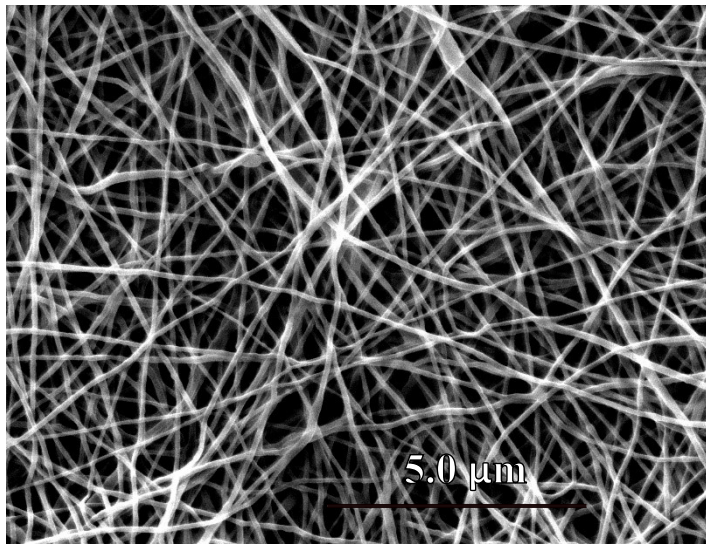

**Figure S6.** SEM image of mucin-based nanofibers.

A

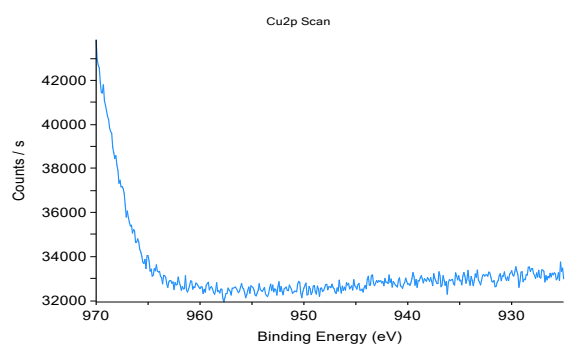

B

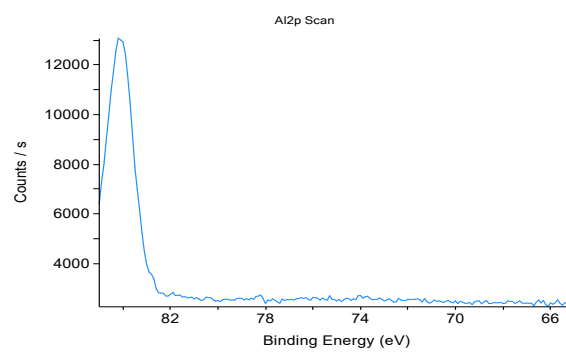

**Figure S7.** XPS of (A) Cu and (B) Al in the mixed-metal solution after adsorption test with mucin NFs.



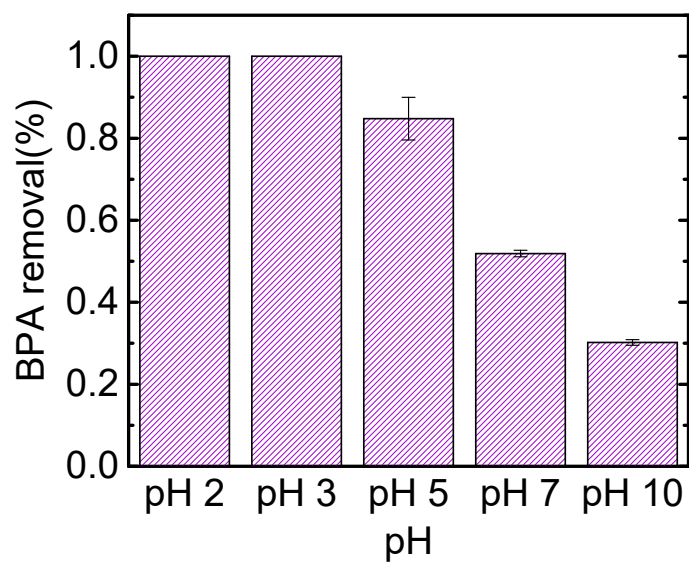

**Figure S8.** Effect of initial pH on the removal of BPA in the presence of Au@mucin catalyst and PMS.

**Table S1.** Second-order Kinetics values for Au adsorption by mucin, calculated with

the equation: 
$$q_{(t)} = \frac{q_e^2 * k_2 * t}{1 + q_e * k_2 * t}$$

|       |                       | 0.025 mM | 0.05 mM    | 0.1 mM     |
|-------|-----------------------|----------|------------|------------|
| $k_2$ | [g/mg/hr]             | 0.00187  | 3.21199E-4 | 7.57026E-5 |
| $q_e$ | [mg g <sup>-1</sup> ] | 17.22575 | 64.81353   | 156.35628  |
| $R^2$ | -                     | 0.969837 | 0.990882   | 0.995377   |

**Table S2.** Reduction potentials of metals

(Petr Vanýsek, in *CRC Handbook of Chemistry and Physics*, ed. William M. Haynes, 92th edn., 2011)

| Reaction                                 | Potential (E <sup>0</sup> vs. SHE, eV) |
|------------------------------------------|----------------------------------------|
| $2RSH \rightarrow RS - SR + 2H^+ + 2e^-$ | -0.318                                 |
| $Au^{3+} + 3e^- \rightarrow Au$          | 1.498                                  |
| $Pd^{2+} + 2e^- \rightarrow Pd$          | 0.951                                  |
| $Fe^{3+} + e^- \rightarrow Fe^{2+}$      | 0.771                                  |
| $Cu^{2+} + 2e^- \rightarrow Cu$          | 0.3419                                 |
| $Fe^{3+} + 3e^- \rightarrow Fe$          | -0.037                                 |
| $Fe^{2+} + 2e^- \rightarrow Fe$          | -0.447                                 |
| $Al^{3+} + 3e^- \rightarrow Al$          | -1.662                                 |

**Table S3.** Chemical elements from XPS analysis before EDTA cleaning

| <i>Name</i>               | <i>Peak BE</i> | <i>FWHM eV</i> | <i>Area (P) CPS.eV</i> | <i>Atomic %</i> |
|---------------------------|----------------|----------------|------------------------|-----------------|
| C 1s                      | 285.23         | 3.25           | 873209.41              | 70.71           |
| O 1s (~8% area is Pd 3p3) | 532.40         | 3.41           | 744047.87              | 23.73           |
| N 1s                      | 399.90         | 3.02           | 65916.00               | 3.36            |
| Fe 2p                     | 711.91         | 6.02           | 150920.93              | 1.09            |
| P 2p                      | 133.56         | 1.61           | 9770.52                | 0.55            |
| Au 4f7                    | 84.12          | 2.34           | 46806.63               | 0.30            |
| Pd 3d5                    | 338.23         | 2.32           | 36060.75               | 0.26            |

**Table S4.** Chemical elements after EDTA cleaning

| <i>Name</i> | <i>Peak BE</i> | <i>FWHM eV</i> | <i>Area (P) CPS.eV</i> | <i>Atomic %</i> |
|-------------|----------------|----------------|------------------------|-----------------|
| Au 4f       | 85.52          | 7.43           | 216238.56              | 0.30            |
| N 1s        | 399.93         | 3.78           | 29209.61               | 0.59            |
| O 1s        | 532.24         | 4.75           | 1948135.44             | 24.61           |
| C 1s        | 285.06         | 5.27           | 2361583.24             | 74.51           |
